# Supplementary material
Source: publisher figshare collection journal article supplement (https://sage.figshare.com/ndownloader/files/13013054)
Supplement: Supplementary file 1 [file 13013054]

## Appendix C

# Alternative chart formats and feedback

### Version included in summary (Round 2)

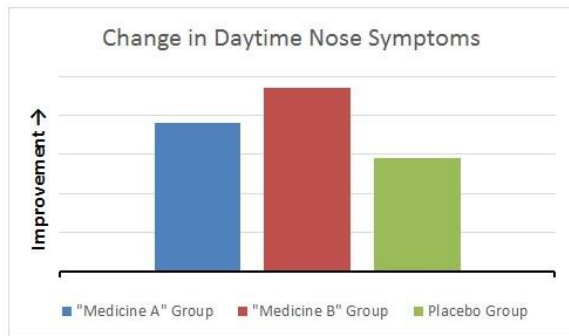

### Alternative # 1

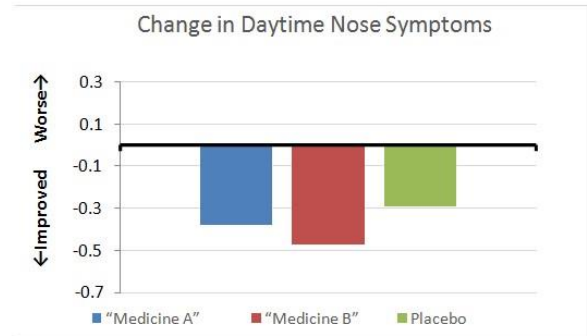

### Alternative # 2

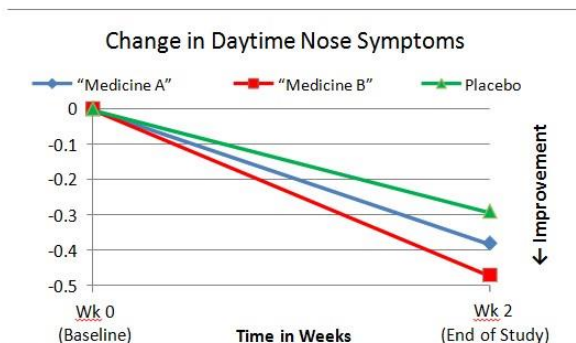

### Alternative # 3

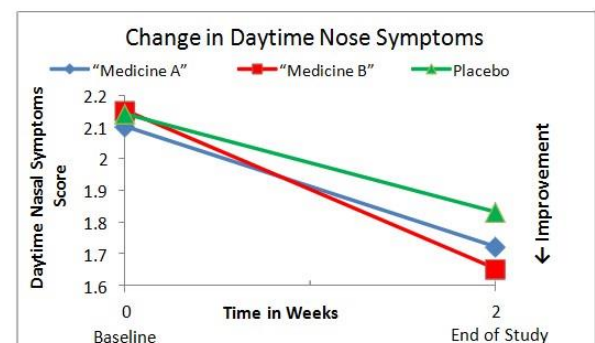

## Feedback

As stated in the results, the majority of participants in Round 2 preferred the chart that was included in the main body of the summary. Feedback given about the other 3 alternative charts is provided below for reference:

- Of the other alternative charts, some participants did mention that they liked Alternative # 3, mentioning that they liked the fact that the chart showed the "timeline", i.e. that 2 weeks had passed.
- Before participants in Round 2 saw the alternative versions they made reference to wanting a scale or numbers on the chart. However, the scales in the alternative versions were not necessarily viewed as helpful, for example *"The numbers on these don't mean much to me at all."* This is noteworthy as many participants commented on the lack of numbers.
- Participants commented on the alternative charts where the improvement was shown as a downward movement on the chart, for example one participant said *"[...] a lot of people would have a problem with the fact that the bar chart is going down, you tend to assume things going up are better"*.
- There was some feedback received regarding the use of colour in the chart (red, blue, green). One participant seemed unable to see the green bar on the first version of the chart. It is not clear

why this was, but it is known that red and green can be problematic for users with colour blindness. Another participant also commented on the use of red and green for a different reason, particularly the negative and positive connotations that these two colours may have. They suggested that the use of red signalled a negative response in their mind, and vice versa for green.
